# Supplementary material for: Worldwide Exploration of Renal Replacement Outcomes Collaborative in Kidney Disease (WE-ROCK)
Source: PubMed Central journal article supplement — Kidney Int Rep. 2023 Jun 5;8(8):1542–52. doi: 10.1016/j.ekir.2023.05.026 (PMC10403688; doi:10.1016/j.ekir.2023.05.026), 2023-06-05

**Supplemental Table S1. Site, city, country, principal investigator of WE-ROCK registry, total hospital bed capacity and Intensive Care Unit Bed capacity.**

|    | Site (City)                                                     |                                  | Principal Investigator             | Hospital Bed Capacity | ICU Bed Capacity (excludes NICU) |
|----|-----------------------------------------------------------------|----------------------------------|------------------------------------|-----------------------|----------------------------------|
| 1  | Kings College (London)                                          | United Kingdom                   | Akash Deep                         | 195                   | 16                               |
| 2  | Bambino Gesu Children's Hospital                                | Italy                            | Gabriella Bottari<br>Valeria Raggi | 607                   | 32                               |
| 3  | Meyer Children Hospital (Florence)                              | Italy                            | Zaccaria Ricci                     | 200                   | 15                               |
| 4  | Gregorio Marañón University Hospital (Madrid)                   | Spain                            | Sarah Fernandez LaFever            | 190                   | 17                               |
| 5  | Medical University (Innsbruck)                                  | Austria                          | Gerard Cortina                     | 120                   | 10                               |
| 6  | Royal Children's Hospital (Melbourne)                           | Australia                        | Ben Gelbart                        | 350                   | 22                               |
|    |                                                                 |                                  |                                    |                       |                                  |
| 7  | Hospital for Sick Children (Toronto)                            | Canada                           | Michael Zappitelli                 | 279                   | 44                               |
| 8  | Stollery Children's Hospital (Edmonton)                         | Canada                           | Rachid Alobaidi                    | 218                   | 30                               |
|    |                                                                 | <b>United States<br/>(State)</b> |                                    |                       |                                  |
| 9  | Cincinnati Children's Hospital (Cincinnati)                     | Ohio                             | Katja Gist                         | 622                   | 82                               |
| 10 | Seattle Children's Hospital (Seattle)                           | Washington                       | Shina Menon                        | 407                   | 56                               |
| 11 | Stanford Children's Hospital (Palo Alto)                        | California                       | Michaela Damian                    | 249                   | 72                               |
| 12 | Mattel Children's Hospital (Los Angeles)                        | California                       | Rachana Srivastava                 | 90                    | 24                               |
| 13 | Children's Hospital Colorado (Aurora)                           | Colorado                         | Erin Stenson                       | 434                   | 68                               |
| 14 | Mercy Children's Hospital (Kansas City)                         | Kansas                           | Kristin Dolan                      | 390                   | 67                               |
| 15 | St Louis Children's Hospital (St. Louis)                        | Missouri                         | Tara Neumyer                       | 350                   | 60                               |
| 16 | University of Iowa Stead Family Children's Hospital (Iowa City) | Iowa                             | Issa Alhamoud                      | 227                   | 28                               |
| 17 | Texas Children's Hospital (Houston)                             | Texas                            | Sameer Thadani                     | 973                   | 160                              |
| 18 | Nationwide Children's Hospital (Columbus)                       | Ohio                             | Aimee Bigelow                      | 706                   | 76                               |
| 19 | Children's Hospital of Pittsburgh (Pittsburgh)                  | Pennsylvania                     | Dana Fuhrman                       | 313                   | 60                               |
| 20 | Riley Children's Hospital (Indianapolis)                        | Indiana                          | Michelle Starr                     | 354                   | 46                               |
| 21 | University of Minnesota Children's Hospital (Minneapolis)       | Minnesota                        | Shanti Balani                      | 254                   | 24                               |
| 22 | C.S. Mott Children's Hospital (Ann Arbor)                       | Michigan                         | Stephen Gorga                      | 348                   | 50                               |
| 23 | Children's National (Washington DC)                             | --                               | Aadil Kakajiwala                   | 323                   | 73                               |

|    |                                                                           |                |                    |     |     |
|----|---------------------------------------------------------------------------|----------------|--------------------|-----|-----|
| 24 | Maria Fareri Children's Hospital at Westchester Medical Center (Valhalla) | New York       | Sonia Solomon      | 146 | 18  |
| 25 | Cohen Children's Medical Center (New Hyde Park)                           | New York       | Abby Basalely      | 112 | 37  |
| 26 | Lurie Children's Hospital (Chicago)                                       | Illinois       | Theresa Mottes     | 360 | 102 |
| 27 | LeBonheur Children's Hospital (Memphis)                                   | Tennessee      | Pilar Anton-Martin | 255 | 30  |
| 28 | Medical University of South Carolina (Charleston)                         | South Carolina | David Selewski     | 199 | 43  |
| 29 | Children's of Alabama (Birmingham)                                        | Alabama        | Tennille Webb      | 380 | 44  |
| 30 | Children's Healthcare of Atlanta (Atlanta)                                | Georgia        | Stella Shin        | 679 | 124 |
| 31 | Omaha Children's Hospital (Omaha)                                         | Nebraska       | Melissa Muff-Luett | 247 | 54  |
| 32 | Golisano Children's Hospital (Rochester)                                  | New York       | Susan Martin       | 172 | 28  |

**Supplemental Table S2. Summary of variables collected**

| <b>Form</b>                                                                            | <b>Variables</b>                                                                                                                                                                                                                                                                  |                                                                                                                                                                                                                                                                                                                                                                |
|----------------------------------------------------------------------------------------|-----------------------------------------------------------------------------------------------------------------------------------------------------------------------------------------------------------------------------------------------------------------------------------|----------------------------------------------------------------------------------------------------------------------------------------------------------------------------------------------------------------------------------------------------------------------------------------------------------------------------------------------------------------|
| <b>Demographics and Baseline Form</b>                                                  | <ul style="list-style-type: none"> <li>• Age</li> <li>• Sex</li> <li>• Race</li> <li>• Ethnicity</li> <li>• Weight</li> <li>• Height</li> <li>• Body surface area</li> <li>• Body mass index</li> </ul>                                                                           | <ul style="list-style-type: none"> <li>• Admission diagnosis</li> <li>• Sepsis on admission</li> <li>• Comorbidities</li> <li>• PRISM-III</li> <li>• Baseline serum creatinine</li> <li>• ICU admission creatinine</li> <li>• Admission platelet count</li> <li>• Functional Status Scale</li> </ul>                                                           |
| <b>Pre-CRRT Initiation</b>                                                             | <ul style="list-style-type: none"> <li>• Urine neutrophil gelatinase associated lipocalin</li> <li>• Sepsis at start</li> <li>• Vasoactive inotrope score</li> <li>• PELOD-2 score</li> </ul>                                                                                     | <ul style="list-style-type: none"> <li>• Cumulative fluid balance from ICU admission</li> <li>• Urine output 24 hours prior to start</li> <li>• Diuretic challenge</li> <li>• Hourly urine output in response to diuretic</li> </ul>                                                                                                                           |
| <b>Daily CRRT Data (repeating measure x 7 days)</b>                                    | <ul style="list-style-type: none"> <li>• Weight</li> <li>• Urine output (indexed to weight and h)</li> <li>• Serum creatinine</li> <li>• NGAL</li> <li>• Phosphorus</li> <li>• Cystatin C</li> <li>• Glucose</li> <li>• Platelet count</li> <li>• Insulin use and dose</li> </ul> | <ul style="list-style-type: none"> <li>• Filter type</li> <li>• Modality</li> <li>• Anticoagulation</li> <li>• Dialysis prescription</li> <li>• Net ultrafiltration rate</li> <li>• Access location and size catheter</li> <li>• Diuretic challenge</li> <li>• Hourly urine output in response to diuretic</li> <li>• Highest daily vasoactive dose</li> </ul> |
| <b>Additional CRRT Information</b>                                                     | <ul style="list-style-type: none"> <li>• Liberation attempt, and success</li> <li>• PELOD-2</li> <li>• Serum creatinine 24 hours after Liberation</li> </ul>                                                                                                                      | <ul style="list-style-type: none"> <li>• Ventilation duration during CRRT</li> <li>• Positive culture after CRRT</li> <li>• CRRT duration (total) in days</li> <li>• Therapeutic plasma exchange</li> </ul>                                                                                                                                                    |
| <b>Daily Liberation Form (repeating measure x 7 days) for first liberation attempt</b> | <ul style="list-style-type: none"> <li>• Weight</li> <li>• Urine output (indexed to weight and h)</li> <li>• Serum creatinine</li> </ul>                                                                                                                                          | <ul style="list-style-type: none"> <li>• Diuretic challenge</li> <li>• Hourly urine output in response to diuretic</li> <li>• Cystatin C</li> <li>• NGAL</li> </ul>                                                                                                                                                                                            |
| <b>Outcomes</b>                                                                        | <ul style="list-style-type: none"> <li>• Total ventilation duration</li> <li>• ICU length of stay</li> <li>• Hospital length of stay</li> <li>• Survival to discharge</li> <li>• CRRT at discharge</li> <li>• Serum creatinine at discharge</li> </ul>                            | <ul style="list-style-type: none"> <li>• Discharge FSS (survivors)</li> <li>• 6 Month FSS</li> <li>• 1-year FSS</li> <li>• Time to death from CRRT initiation</li> <li>• 90-day dialysis dependence</li> <li>• 90-day Serum creatinine</li> </ul>                                                                                                              |

PRISM-III, Pediatric Risk of Mortality-III; ICU, intensive care unit; PELOD-2, Pediatric Logistic Organ Dysfunction-2; NGAL, neutrophil gelatinase associated lipocalin; CRRT, continuous renal replacement therapy; FSS, Functional Status Scale.

Supplemental Figure S1. Histogram summarizing the number of centers by size according to intensive care unit bed capacity.

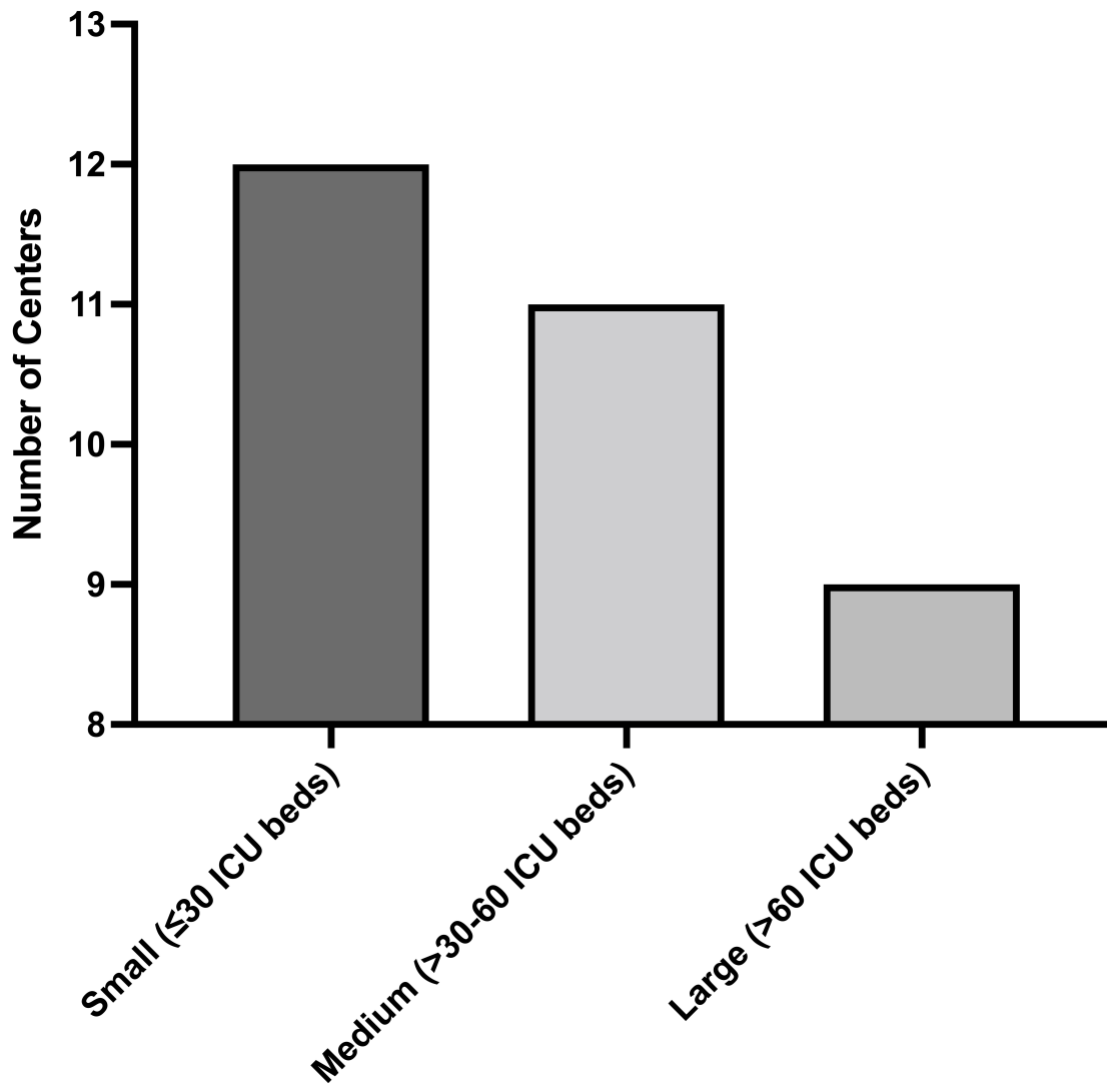

Supplement: mmc1.pdf [file mmc1.pdf]
